# Supplementary material for: BRD3/4 inhibition and FLT3-ligand deprivation target pathways that are essential for the survival of human MLL-AF9+ leukemic cells
Source: PubMed Central journal article supplement (PMC5730124; doi:10.1371/journal.pone.0189102), 2017-12-14
Supplement: pone.0189102.s002.pdf [file pone.0189102.s002.pdf]

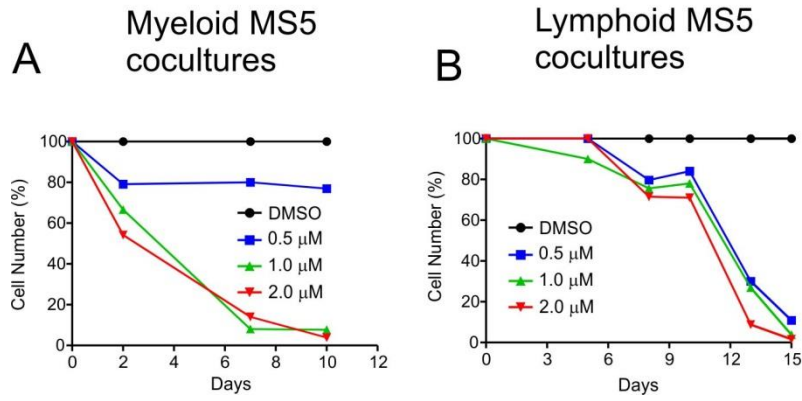

**S1 Fig. I-BET151 inhibits MLL-fusion leukemic cord blood models.** Growth curves for CB MLL-AF9 MS5 co-cultures (myeloid (A) and lymphoid (B) conditions) upon I-BET151 treatment.
